# Supplementary material for: Divide and conquer: two stem cell populations in squamous epithelia, reserves and the active duty forces
Source: PubMed Central journal article supplement (PMC6802623; doi:10.1038/s41368-019-0061-2), 2019-08-27
Supplement: 41368_2019_61_MOESM2_ESM.pdf [file 41368_2019_61_MOESM2_ESM.pdf]

mTORC1 targets

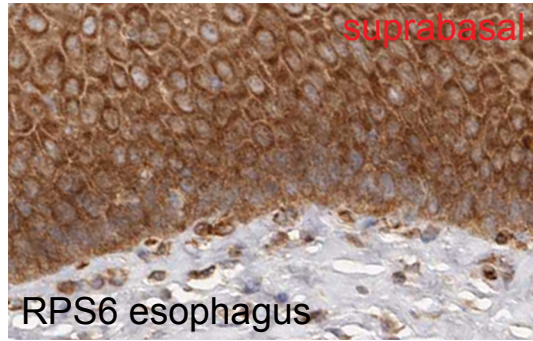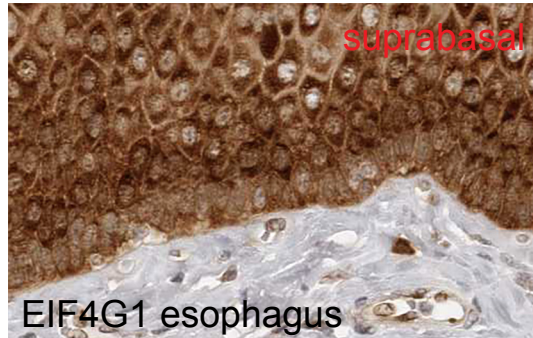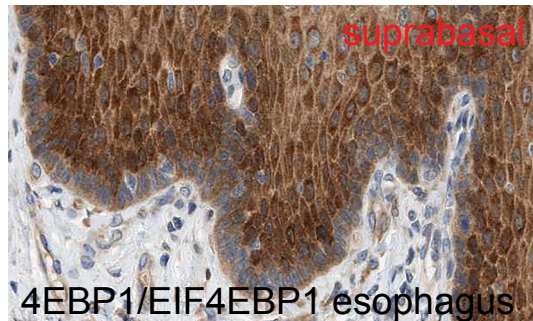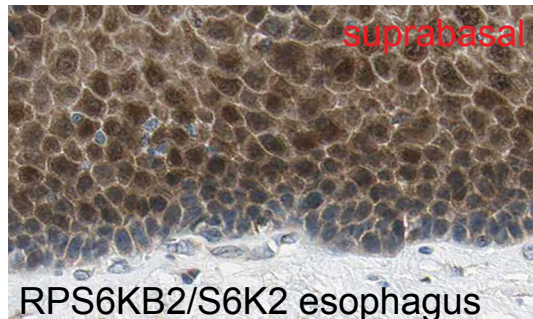

mTORC1 binding protein

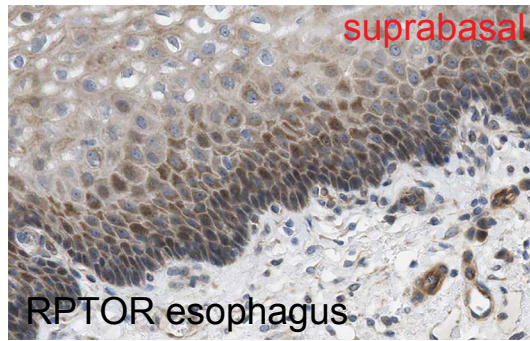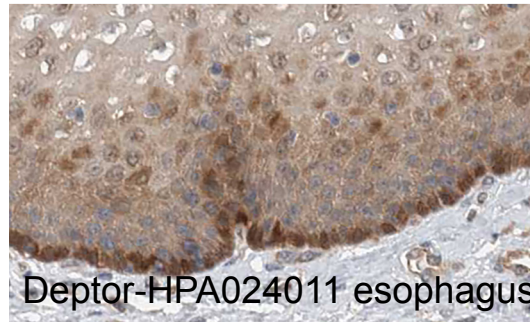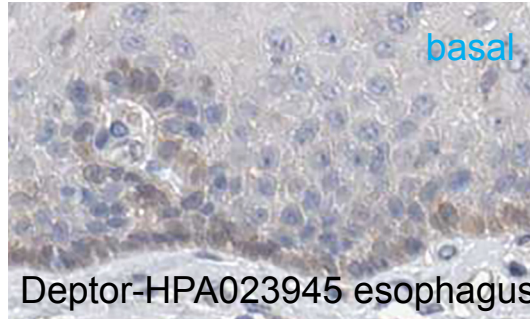

opposing transcriptional regulators of autophagy

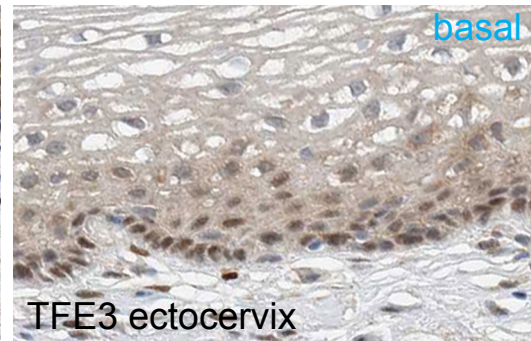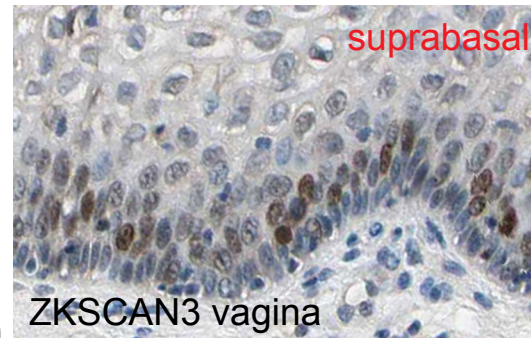

glucose and amino acid transporters related to mTORC1 activity

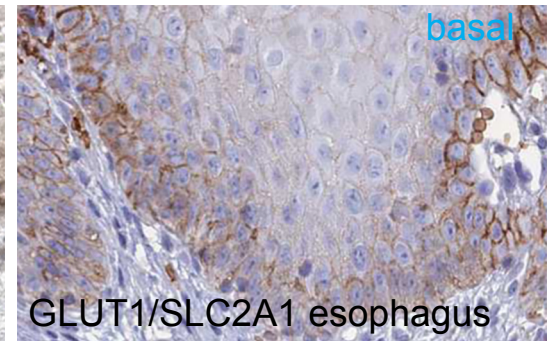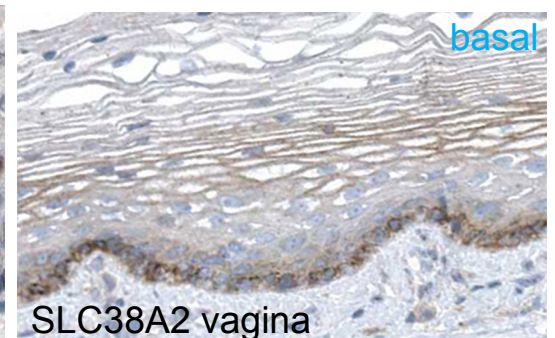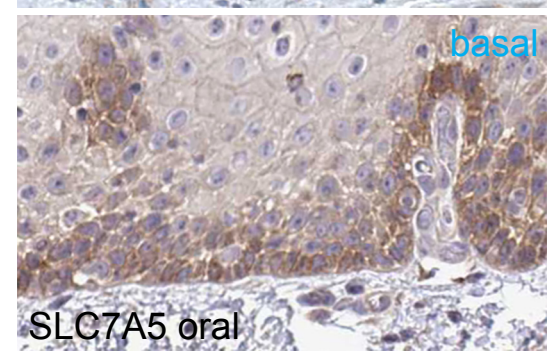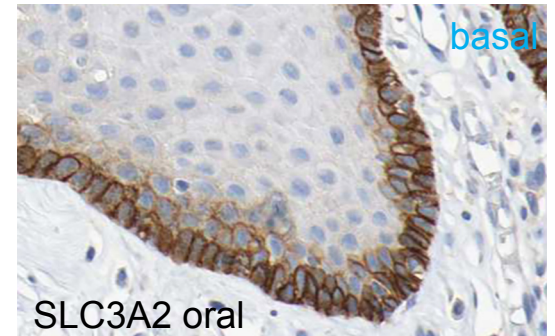

suprabasal expression of mTOR target proteins

basal expression of protein associated with mTORC1 inhibition and nutrient import
