# Supplementary material for: Divide and conquer: two stem cell populations in squamous epithelia, reserves and the active duty forces
Source: PubMed Central journal article supplement (PMC6802623; doi:10.1038/s41368-019-0061-2), 2019-08-27

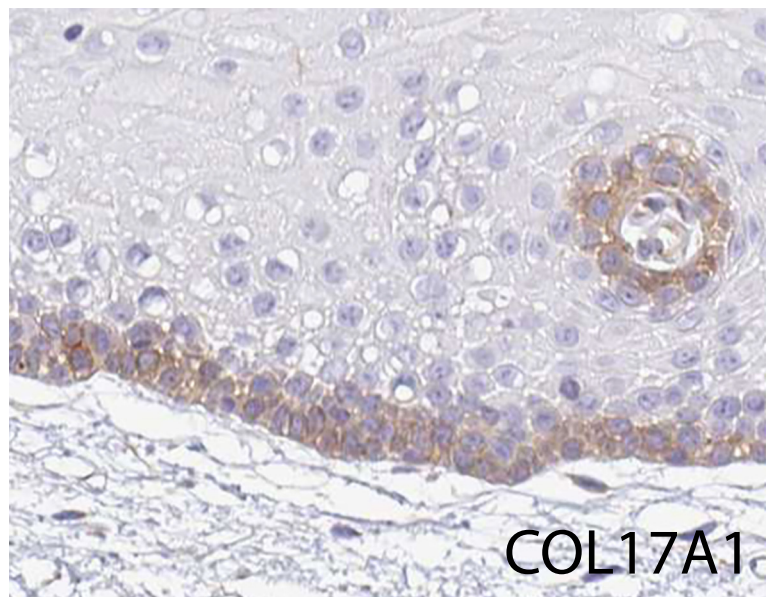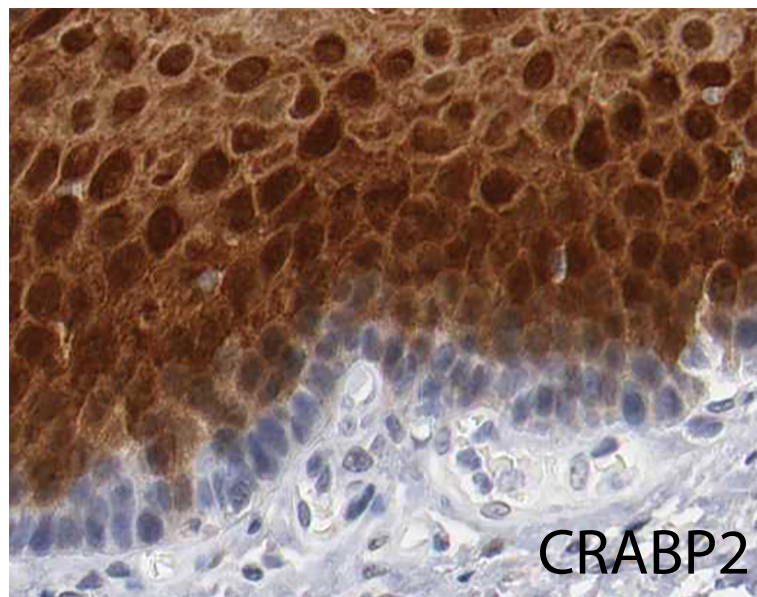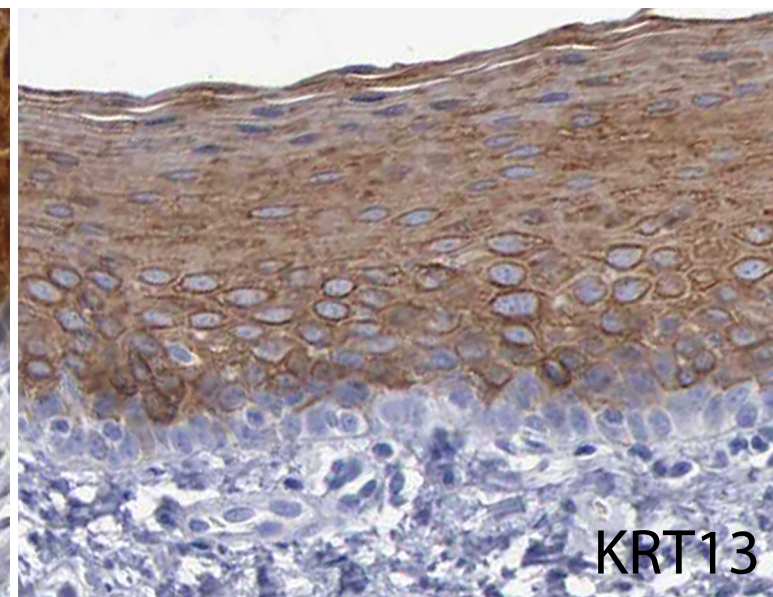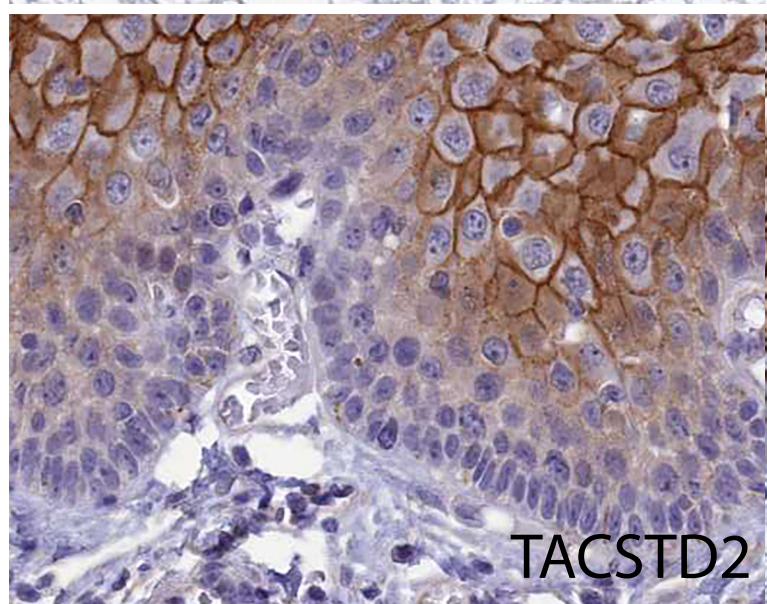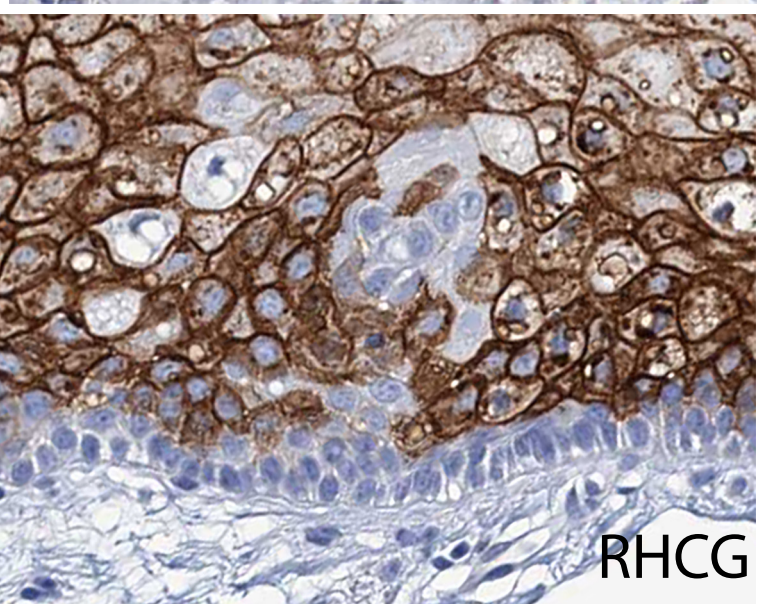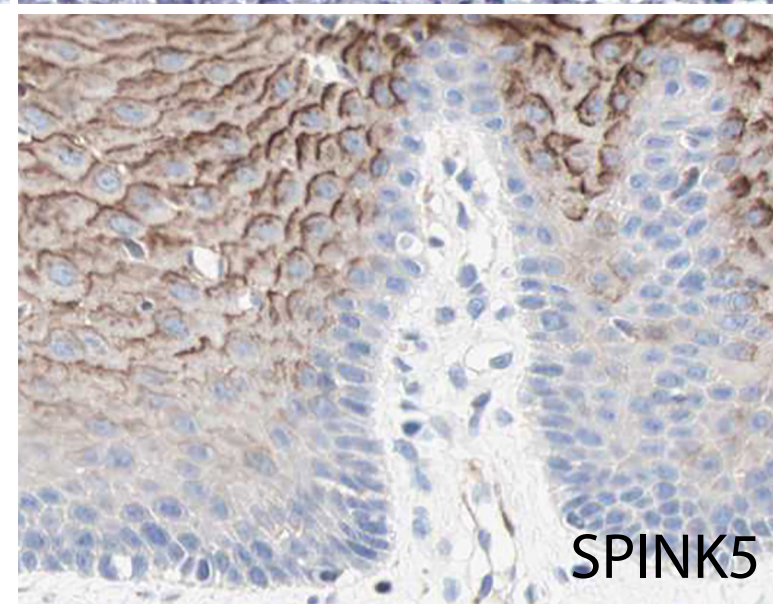

Supplement: 41368_2019_61_MOESM3_ESM.pdf [file 41368_2019_61_MOESM3_ESM.pdf]
